# Supplementary material for: Pressure dependence of superconductivity in alkali-Bi compounds KBi2 and RbBi2
Source: Royal Society of Chemistry journal article supplement (doi:10.1039/d2cp00679k), 2022-01-01
Supplement: d2cp00679k1.pdf [file d2cp00679k1.pdf]

## Supporting Information

### Pressure dependence of superconductivity in alkali-Bi compounds $\text{KBi}_2$ and $\text{RbBi}_2$

Huan Li<sup>1</sup>, Mitsuki Ikeda<sup>1</sup>, Ai Suzuki<sup>1</sup>, Tomoya Taguchi<sup>1</sup>, Yanting Zhang<sup>1</sup>, Hidenori Goto<sup>1</sup>, Ritsuko Eguchi<sup>1</sup>, Yen-Fa Liao<sup>2</sup>, Hirofumi Ishii<sup>2</sup>, and Yoshihiro Kubozono<sup>1\*</sup>

<sup>1</sup>Research Institute for Interdisciplinary Science, Okayama University,  
Okayama 700-8530, Japan

<sup>2</sup>National Synchrotron Radiation Research Center, Hsinchu 30076, Taiwan

**Table S1.** Lattice constants of KBi<sub>2</sub> determined at 0, 2.42, 6.41 and 20.1 GPa.

| $p$ (GPa) | Phase            | $a$ (Å)    | $b$ (Å)   | $c$ (Å)    | Space group  | $R_p$ (%) | $wR_p$ (%) |
|-----------|------------------|------------|-----------|------------|--------------|-----------|------------|
| 0         | KBi <sub>2</sub> | 9.56415(6) |           |            | $Fd\bar{3}m$ | 2.85      | 4.59       |
|           | Bi-I             | 4.5671(1)  |           | 11.935(1)  | $R\bar{3}m$  |           |            |
| 2.42      | KBi <sub>2</sub> | 9.40401(9) |           |            | $Fd\bar{3}m$ | 1.08      | 1.75       |
|           | Bi-I             | 4.5108(1)  |           | 11.5629(7) | $R\bar{3}m$  |           |            |
| 6.41      | KBi <sub>2</sub> | 9.1811(3)  |           |            | $Fd\bar{3}m$ | 1.57      | 3.14       |
|           | Bi-III(1)        | 8.586(1)   |           | 3.1977(7)  | $I4/mmm$     |           |            |
|           | Bi-III(2)        | 8.594(1)   |           | 4.1986(9)  | $I4/mcm$     |           |            |
| 20.1      | KBi <sub>2</sub> | 8.812(2)   |           |            | $Fd\bar{3}m$ | 1.30      | 2.42       |
|           | KBi              | 5.156(1)   | 14.570(3) | 5.3782(2)  | $Cm$         |           |            |
|           | Bi-V             | 3.71771(6) |           |            | $Im\bar{3}m$ |           |            |

**Table S2.** Lattice constants of RbBi<sub>2</sub> determined at 0, 1.58, 8.36 and 17.0 GPa.

| $p$ (GPa) | Phase             | $a$ (Å)    | $c$ (Å)     | Space group    | $R_p$ (%) | $wR_p$ (%) |
|-----------|-------------------|------------|-------------|----------------|-----------|------------|
| 0         | RbBi <sub>2</sub> | 9.65694(8) |             | $Fd\bar{3}m$   | 2.19      | 3.28       |
|           | Bi-I              | 4.56665(8) | 11.9144(4)  | $R\bar{3}m$    |           |            |
| 1.58      | RbBi <sub>2</sub> | 9.5327(1)  |             | $Fd\bar{3}m$   | 1.05      | 1.78       |
|           | Bi-I              | 4.5388(1)  | 11.6822 (8) | $R\bar{3}m$    |           |            |
| 8.36      | RbBi <sub>2</sub> | 9.1402(2)  |             | $Fd\bar{3}m$   | 0.98      | 1.56       |
|           | Bi-III(2)         | 8.5580(2)  | 4.1715(5)   | $I4/m\bar{c}m$ |           |            |
|           | Bi-V              | 3.83122(3) |             | $Im\bar{3}m$   |           |            |
| 17.0      | RbBi <sub>2</sub> | 8.8393(6)  |             | $Fd\bar{3}m$   | 1.56      | 2.56       |
|           | Bi-V              | 3.72861(3) |             | $Im\bar{3}m$   |           |            |

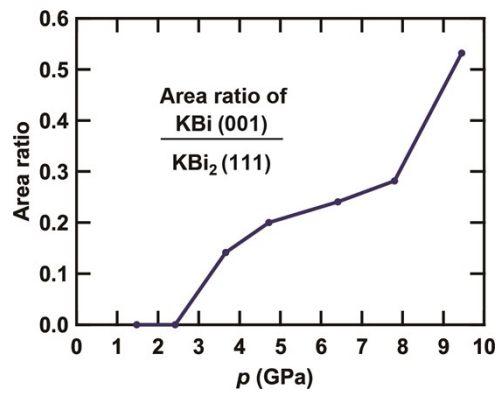

Figure S1. Pressure dependence of the area ratio of 001 peak of KBi with respect to 111 peak of KBi<sub>2</sub>. The area ratio cannot be evaluated from complete disappearance of 111 peak of KBi<sub>2</sub> above 9.45 GPa,

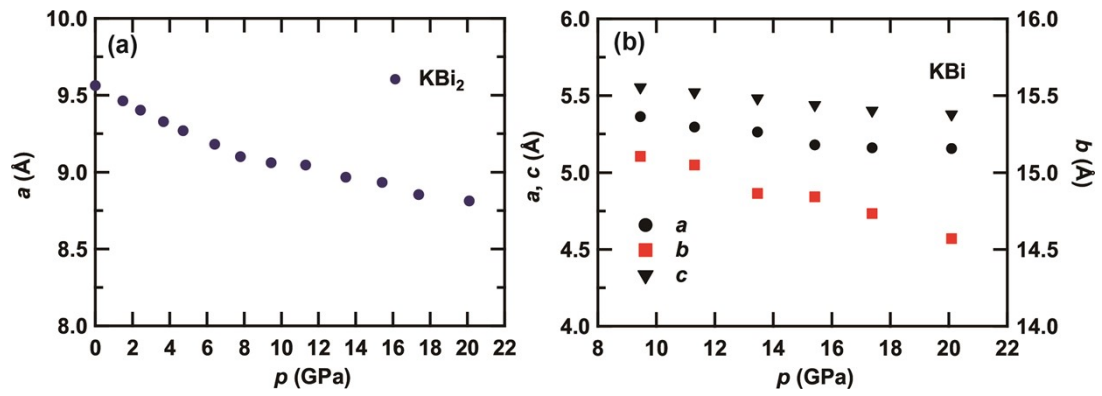

Figure S2. (a)  $a - p$  plot of KBi<sub>2</sub>. (b) Plots of  $a - p$ ,  $b - p$  and  $c - p$  of KBi;  $a$ ,  $b$  and  $c$  refer to the black circle, red square and black triangle, respectively.

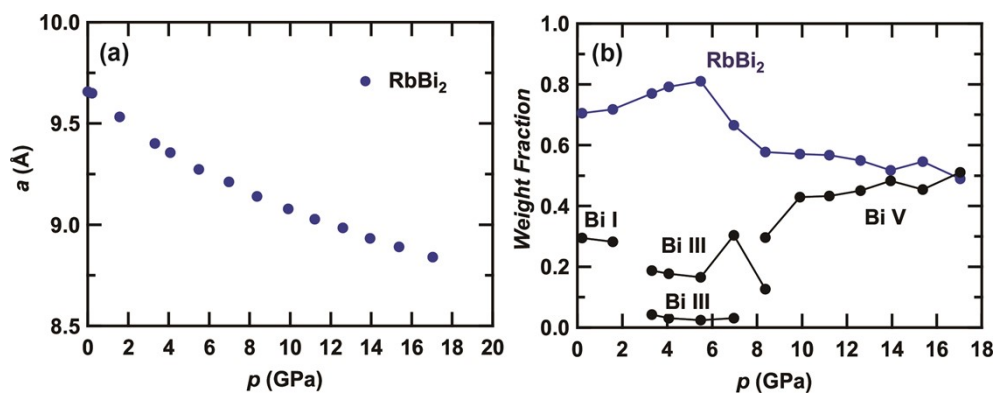

Figure S3. (a)  $a - p$  plot of  $\text{RbBi}_2$ . (b) Pressure dependence of weight fraction for  $\text{RbBi}_2$  and Bi. The weight fraction is evaluated from the Rietveld refinement for pressure-dependent XRD patterns (not shown).

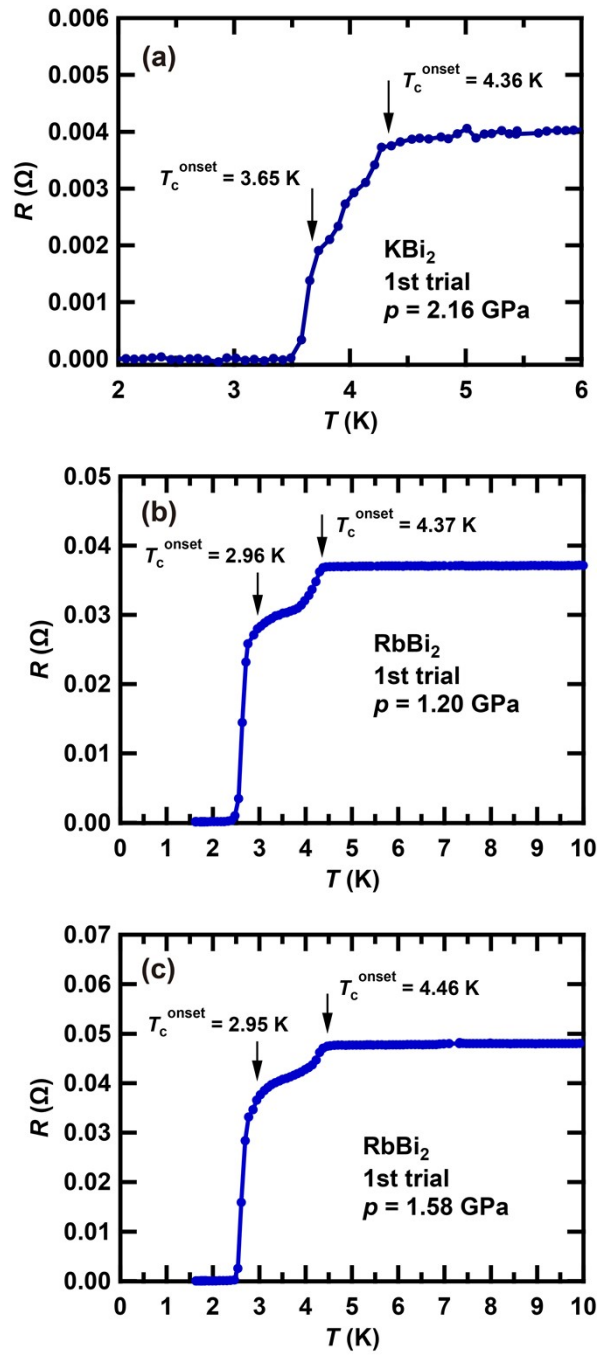

Figure S4. (a)  $R - T$  plot of  $\text{KBi}_2$  at 2.16 GPa which is the first trial of measurement of  $R$  against temperature.  $R - T$  plots of  $\text{RbBi}_2$  at (b) 1.20 GPa and (c) 1.58 GPa which are the first trial of measurement of  $R$  against temperature.

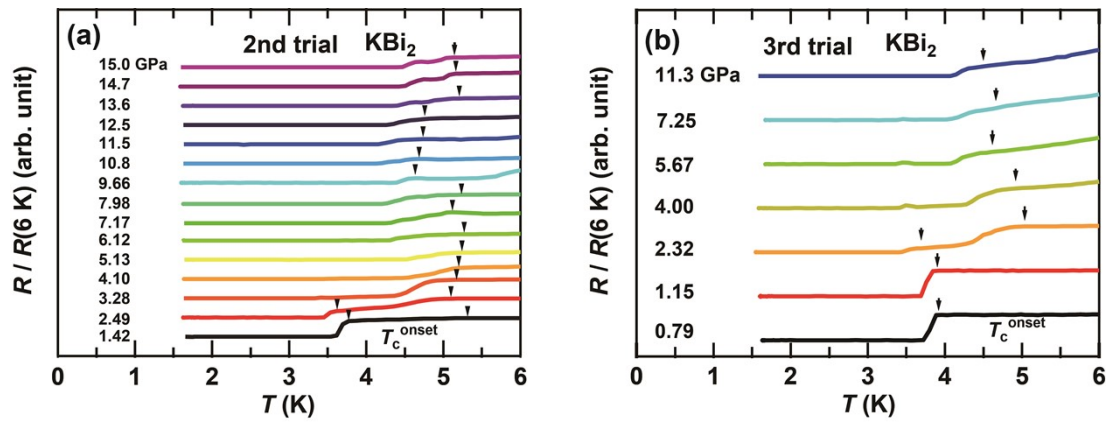

Figure S5.  $R / R(6\text{ K}) - T$  plots of  $\text{KBi}_2$  obtained from (a) the second and (b) the third trials of measurement of  $R$  against temperature. The different batch of sample was employed in each trial.



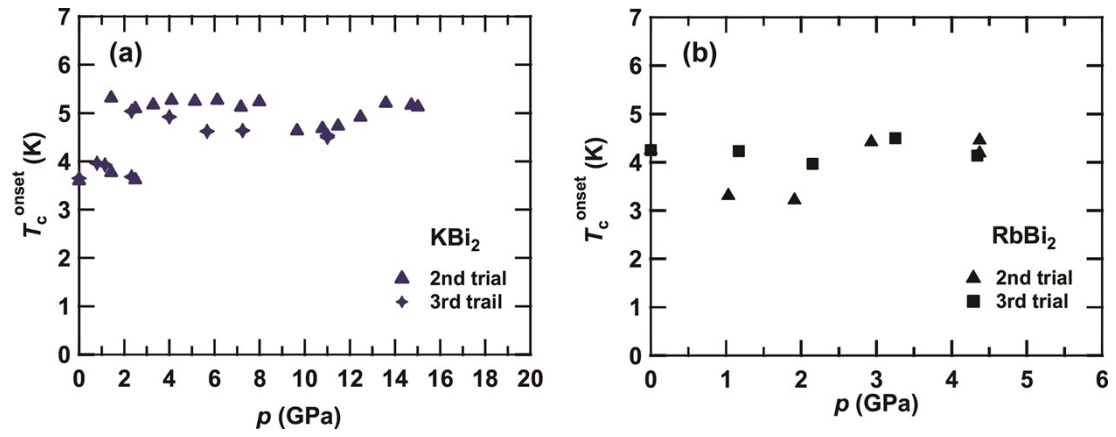

Figure S6.  $T_c^{\text{onset}} - p$  plot of (a)  $\text{KBi}_2$  and (b)  $\text{RbBi}_2$ ; In each trial, different batch of sample is employed. The plots are obtained from the second and third trials of measurement of  $R$  against temperature for  $\text{KBi}_2$  and  $\text{RbBi}_2$  at different pressures.
